# Supplementary material for: Brief communication: Reduction in the future Greenland ice sheet surface melt with the help of solar geoengineering
Source: Copernicus journal article supplement (doi:10.5194/tc-15-3013-2021), 2021-06-30
Supplement: Supplementary file 1 [file tc-15-3013-2021-supplement.pdf]

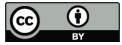

*Supplement of*

**Brief communication: Reduction in the future Greenland ice sheet surface melt with the help of solar geoengineering**

**Xavier Fettweis et al.**

*Correspondence to:* Xavier Fettweis ([xavier.fettweis@uliege.be](mailto:xavier.fettweis@uliege.be))

The copyright of individual parts of the supplement might differ from the article licence.

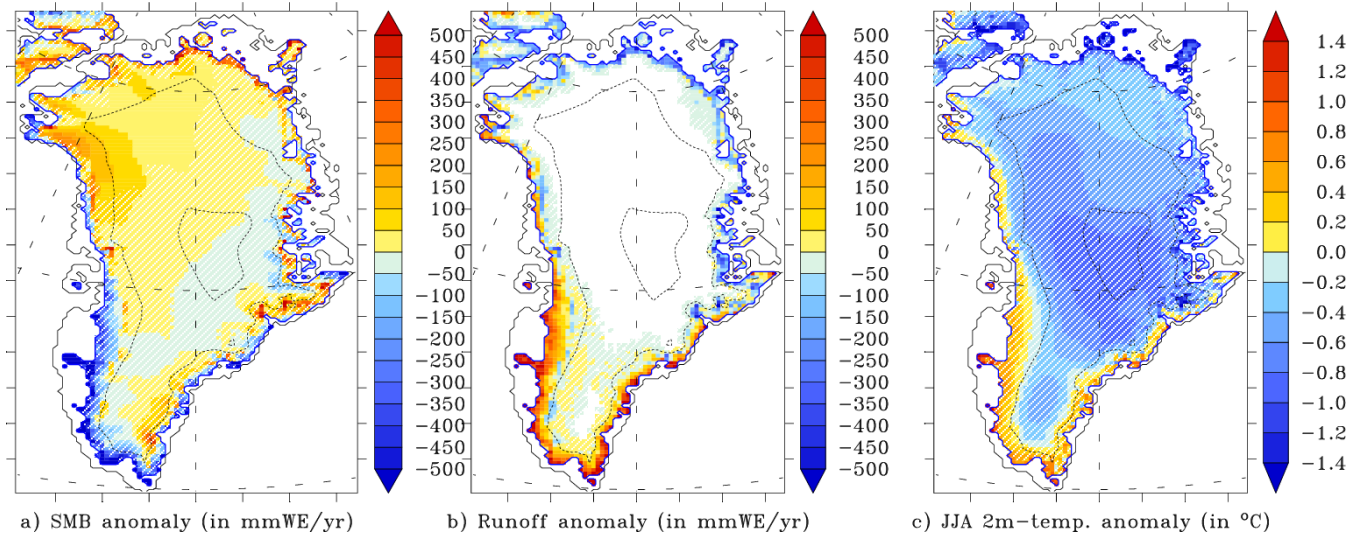

**Fig. S1: a) Annual SMB (in mmWE/yr), b) meltwater runoff and c) summer 2m-temperature anomaly (in °C) of MAR forced by CNRM-ESM2-1 vs MAR forced by ERA5 over 1981-2010. The anomalies lower than the 1981-2010 interannual variability are hatched and then considered as not statistically significant according to Fettweis et al. (2013 and 2017). The ice-sheet margins are represented by a blue line.**

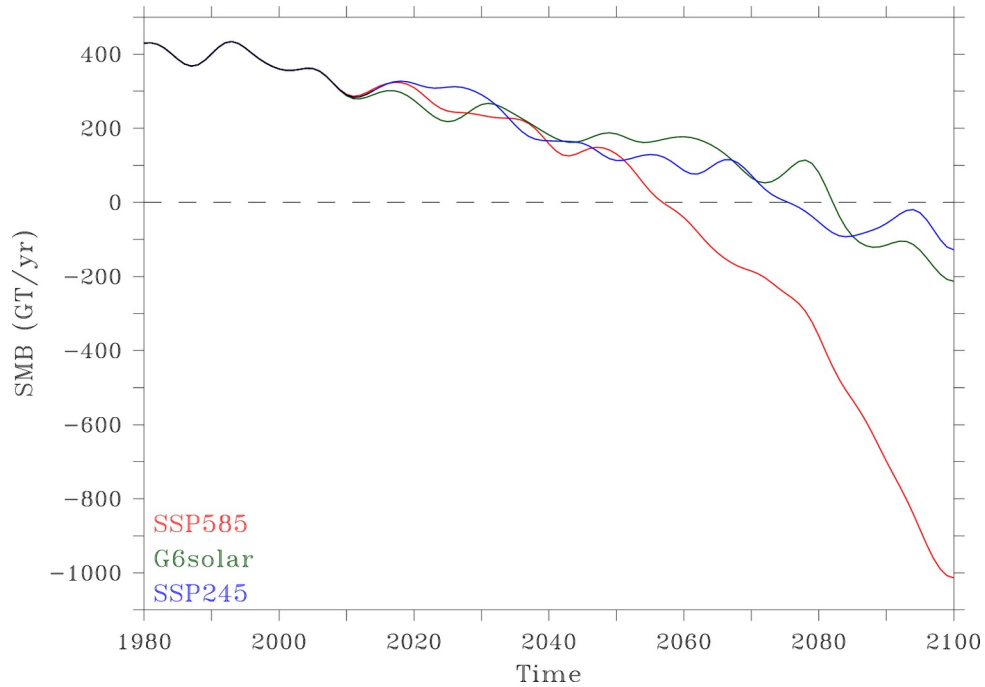

**Fig. S2: Time series of the GrIS SMB in GT/yr (SMB anomalies are shown in Fig. 1b).**

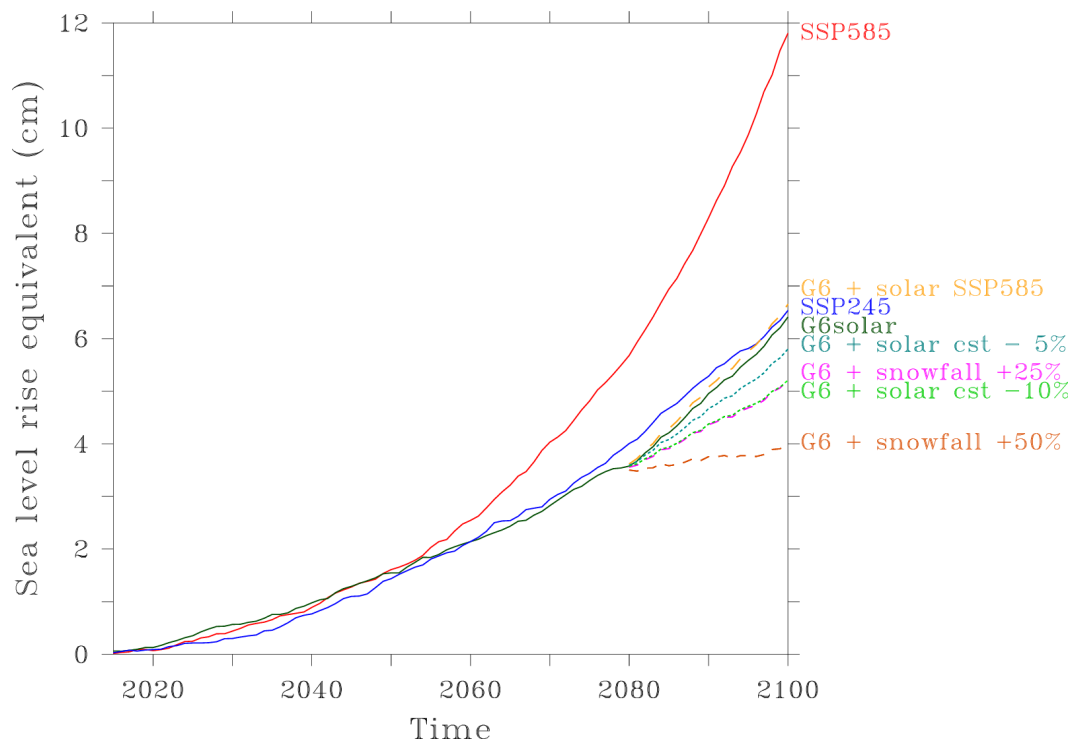

Fig. S3: Same as Fig 2 but from 2010.

|               | SMB<br>(GT/yr) | Snowfall | Runoff | Meltwater | JJA T2m<br>(°C) | JJA SWD<br>(W/m <sup>2</sup> ) |
|---------------|----------------|----------|--------|-----------|-----------------|--------------------------------|
| MAR_ERA5      | 369±101        | 633±57   | 293±83 | 464±106   | -7.8±0.9        | 282±6                          |
| MAR_CNRM-ESM2 | 381±104        | 650±66   | 308±72 | 452±95    | -8.3±0.8        | 282±6                          |

Table S1: Mean integrated values and standard deviation (i.e. the interannual variability) around this mean of SMB, snowfall, runoff, meltwater (in GT/yr) as well as mean summer (JJA) temperature (in °C) and summer solar radiation (in W/m<sup>2</sup>) as simulated by MAR forced by ERA5 and CNRM-ESM2-1 over 1981-2010.

|                      |                                                                                                                        |
|----------------------|------------------------------------------------------------------------------------------------------------------------|
| G6 + solar SSP585    | G6solar with the “fixed” solar constant of SSP585 in the MAR radiative scheme                                          |
| G6 + solar cst - x % | G6solar with the solar constant of G6solar with an additional decrease of x % in the MAR radiative scheme              |
| G6 + snowfall + x %  | G6solar with the solar constant of G6solar with an artificial snowfall increase of x % as input of the MAR snow module |

Table S2: List of the sensitivity experiments shown in Fig 2.
